# Supplementary material for: Both Noncoding and Protein-Coding RNAs Contribute to Gene Expression Evolution in the Primate Brain
Source: PubMed Central journal article supplement — Genome Biol Evol. 2010 Jan 18;2:67–79. doi: 10.1093/gbe/evq002 (PMC2839352; doi:10.1093/gbe/evq002), 2010-01-18
Supplement: evq002_2.pdf [file evq002_2.pdf]

## Summary of Sequence Information

---

---

| <b>Tags</b>                             | <b>% of Total Tag Count</b> |        |
|-----------------------------------------|-----------------------------|--------|
| <i>Total Sequences</i>                  | 7,135,918                   |        |
| <i>Aligned Sequences</i>                | 7,099,155                   | 99.50% |
| <i>Contaminated Sequences</i>           | 22,623                      | 0.30%  |
| <i>Filtered Alignments (of Aligned)</i> | 853,833                     | 12.00% |
| <i>Usable Alignments</i>                | 5,457,225                   | 76.9%  |
| <i>Unique Alignments (of Usable)</i>    | 5,203,590                   | 73.36% |
