# Supplementary material for: Both Noncoding and Protein-Coding RNAs Contribute to Gene Expression Evolution in the Primate Brain
Source: PubMed Central journal article supplement — Genome Biol Evol. 2010 Jan 18;2:67–79. doi: 10.1093/gbe/evq002 (PMC2839352; doi:10.1093/gbe/evq002), 2010-01-18
Supplement: evq002_3.pdf [file evq002_3.pdf]

**Genomic compartments where tags are located. (Each number represents a location where tags map, as opposed to the number of tags from a region)**

| <b>Region</b>                  | <b>Human locations</b> | <b>Human and Chimpanzee locations</b> | <b>Human, Chimpanzee, and Macaque locations</b> | <b>r for expression 2-way conservation</b> | <b>r for expression 3-way conservation</b> |
|--------------------------------|------------------------|---------------------------------------|-------------------------------------------------|--------------------------------------------|--------------------------------------------|
| <b>3' exon sense</b>           | 32226                  | 20636                                 | 4851                                            | 0.8736                                     | 0.8782                                     |
| <b>other exons sense</b>       | 8012                   | 4459                                  | 773                                             | 0.8684                                     | 0.9011                                     |
| <b>intron sense</b>            | 4516                   | 1701                                  | 207                                             | 0.667                                      | 0.6491                                     |
| <b>3' exon antisense</b>       | 6085                   | 2844                                  | 335                                             | 0.8162                                     | 0.8054                                     |
| <b>5' exon antisense</b>       | 138                    | 58                                    | 2                                               | 0.7388                                     | 0.8122                                     |
| <b>exon antisense</b>          | 416                    | 166                                   | 11                                              | 0.6209                                     | 0.7838                                     |
| <b>intron antisense</b>        | 2812                   | 1052                                  | 106                                             | 0.7771                                     | 0.838                                      |
| <b>3' downstream sense</b>     | 4357                   | 2030                                  | 81                                              | 0.7925                                     | 0.7995                                     |
| <b>3' downstream antisense</b> | 2197                   | 802                                   | 119                                             | 0.8421                                     | 0.7425                                     |
| <b>5' upstream sense</b>       | 4508                   | 2138                                  | 642                                             | 0.8124                                     | 0.8555                                     |
| <b>5' upstream antisense</b>   | 2221                   | 805                                   | 63                                              | 0.8393                                     | 0.8595                                     |
