# Supplementary material for: Both Noncoding and Protein-Coding RNAs Contribute to Gene Expression Evolution in the Primate Brain
Source: PubMed Central journal article supplement — Genome Biol Evol. 2010 Jan 18;2:67–79. doi: 10.1093/gbe/evq002 (PMC2839352; doi:10.1093/gbe/evq002), 2010-01-18
Supplement: evq002_4.pdf [file evq002_4.pdf]

|          | Category            | p-val                                               | Top 5.0%  | Total |      |
|----------|---------------------|-----------------------------------------------------|-----------|-------|------|
| GO:      | Cellular Components | cell junction                                       | 0.002617  | 25    | 274  |
|          |                     | synapse                                             | 0.002857  | 19    | 189  |
|          |                     | presynaptic membrane                                | 0.003066  | 4     | 13   |
|          |                     | cytosolic small ribosomal subunit                   | 0.004852  | 5     | 23   |
|          |                     | synaptic vesicle                                    | 0.006483  | 7     | 45   |
|          |                     | cytoplasmic vesicle                                 | 0.01187   | 15    | 157  |
|          |                     | mitochondrion                                       | 0.01494   | 56    | 839  |
|          |                     | nucleoplasm                                         | 0.02505   | 24    | 314  |
|          |                     | synaptosome                                         | 0.02591   | 6     | 46   |
|          |                     | cytoskeleton                                        | 0.02782   | 29    | 400  |
|          |                     | heterogeneous nuclear ribonucleoprotein complex     | 0.02987   | 3     | 14   |
|          |                     | nuclear pore                                        | 0.0368    | 7     | 63   |
| GO:      | Molecular Function  | NADH dehydrogenase activity                         | 0.0002805 | 5     | 13   |
|          |                     | hydrolase activity, acting on ester bonds           | 0.001142  | 5     | 17   |
|          |                     | aminoacyl-tRNA ligase activity                      | 0.003063  | 4     | 13   |
|          |                     | NADH dehydrogenase (ubiquinone) activity            | 0.005269  | 6     | 33   |
|          |                     | FMN binding                                         | 0.01142   | 3     | 10   |
|          |                     | double-stranded RNA binding                         | 0.01153   | 5     | 28   |
|          |                     | actin binding                                       | 0.01445   | 20    | 236  |
|          |                     | caspase activator activity                          | 0.01943   | 3     | 12   |
|          |                     | 4 iron, 4 sulfur cluster binding                    | 0.02195   | 4     | 22   |
|          |                     | DNA-dependent ATPase activity                       | 0.02434   | 3     | 13   |
|          |                     | ARF GTPase activator activity                       | 0.02556   | 4     | 23   |
|          |                     | protein binding                                     | 0.03313   | 227   | 4136 |
|          |                     | DNA-directed DNA polymerase activity                | 0.03838   | 4     | 26   |
|          |                     | guanyl nucleotide binding                           | 0.04267   | 3     | 16   |
|          |                     | protein phosphatase inhibitor activity              | 0.04267   | 3     | 16   |
| PANTHER: | Pathways            | Hedgehog signaling pathway                          | 0.004198  | 6     | 32   |
|          |                     | De novo pyrimidine deoxyribonucleotide biosynthesis | 0.02396   | 3     | 13   |
|          |                     | Parkinson disease                                   | 0.02499   | 9     | 86   |
|          |                     | Ubiquitin proteasome pathway                        | 0.02853   | 8     | 74   |
|          |                     | Salvage pyrimidine ribonucleotides                  | 0.02941   | 3     | 14   |
|          |                     | p38 MAPK pathway                                    | 0.0326    | 6     | 49   |
|          |                     | Circadian clock system                              | 0.03545   | 3     | 15   |
| PANTHER: | Molecular Function  | Nucleic acid binding                                | 0.003532  | 104   | 1632 |
|          |                     | G-protein modulator                                 | 0.003887  | 26    | 298  |
|          |                     | Ribosomal protein                                   | 0.004172  | 15    | 140  |
|          |                     | Other G-protein modulator                           | 0.00694   | 16    | 162  |
|          |                     | Transporter                                         | 0.00697   | 34    | 439  |
|          |                     | DNA glycosylase                                     | 0.01142   | 3     | 10   |
|          |                     | DNA strand-pairing protein                          | 0.01397   | 2     | 4    |
|          |                     | Endodeoxyribonuclease                               | 0.01573   | 4     | 20   |
|          |                     | DNA-directed DNA polymerase                         | 0.02195   | 4     | 22   |
|          |                     | Helicase                                            | 0.02208   | 12    | 125  |
|          |                     | Other transporter                                   | 0.0487    | 17    | 220  |

Supplementary Table 3
