# Supplementary material for: Both Noncoding and Protein-Coding RNAs Contribute to Gene Expression Evolution in the Primate Brain
Source: PubMed Central journal article supplement — Genome Biol Evol. 2010 Jan 18;2:67–79. doi: 10.1093/gbe/evq002 (PMC2839352; doi:10.1093/gbe/evq002), 2010-01-18
Supplement: evq002_5.pdf [file evq002_5.pdf]

| <b>Human expressed differentially from the non-human primates: p-value &lt; 0.05.</b> |          |   |    |
|---------------------------------------------------------------------------------------|----------|---|----|
| <b>PANTHER</b>                                                                        |          |   |    |
| Other nucleoside, nucleotide and nucleic acid metabolism                              | 0.04854  | 1 | 1  |
| Oxidative phosphorylation                                                             | 0.04854  | 1 | 1  |
| RNA catabolism                                                                        | 0.04854  | 1 | 1  |
| <b>GO</b>                                                                             |          |   |    |
| protein transport                                                                     | 0.03063  | 2 | 6  |
| RNA interference, production of siRNA                                                 | 0.05     | 1 | 1  |
| RNA interference, targeting of mRNA for destruction                                   | 0.05     | 1 | 1  |
| branching morphogenesis of a tube                                                     | 0.05     | 1 | 1  |
| electron transport chain                                                              | 0.05     | 1 | 1  |
| embryonic hindlimb morphogenesis                                                      | 0.05     | 1 | 1  |
| exocytosis                                                                            | 0.05     | 1 | 1  |
| gene silencing by RNA                                                                 | 0.05     | 1 | 1  |
| gene silencing by miRNA, production of miRNAs                                         | 0.05     | 1 | 1  |
| lung development                                                                      | 0.05     | 1 | 1  |
| mitochondrial electron transport, NADH to ubiquinone                                  | 0.05     | 1 | 1  |
| oligopeptide transport                                                                | 0.05     | 1 | 1  |
| positive regulation of long-term neuronal synaptic plasticity                         | 0.05     | 1 | 1  |
| stem cell maintenance                                                                 | 0.05     | 1 | 1  |
| <b>All differential p-values &lt; 0.05.</b>                                           |          |   |    |
| <b>PANTHER</b>                                                                        |          |   |    |
| Hearing                                                                               | 0.007015 | 2 | 3  |
| Protein targeting                                                                     | 0.01429  | 3 | 11 |
| Protein targeting and localization                                                    | 0.04777  | 3 | 17 |
| Action potential propagation                                                          | 0.04967  | 1 | 1  |
| Other mRNA transcription                                                              | 0.04967  | 1 | 1  |
| Phosphate transport                                                                   | 0.04967  | 1 | 1  |
| <b>GO</b>                                                                             |          |   |    |
| regulation of Rab GTPase activity                                                     | 0.002009 | 3 | 6  |
| ion transport                                                                         | 0.005597 | 6 | 35 |
| mitochondrial electron transport, NADH to ubiquinone                                  | 0.01332  | 2 | 4  |
| electron transport chain                                                              | 0.01391  | 3 | 11 |
| sensory perception of sound                                                           | 0.01792  | 3 | 12 |
| potassium ion transport                                                               | 0.0225   | 3 | 13 |
| protein modification process                                                          | 0.03971  | 3 | 16 |
| translational elongation                                                              | 0.04658  | 3 | 17 |
| DNA-dependent DNA replication                                                         | 0.04913  | 1 | 1  |
| L-glutamate transport                                                                 | 0.04913  | 1 | 1  |
| asparaginyl-tRNA aminoacylation                                                       | 0.04913  | 1 | 1  |
| aspartyl-tRNA aminoacylation                                                          | 0.04913  | 1 | 1  |
| base-excision repair, gap-filling                                                     | 0.04913  | 1 | 1  |
| clustering of voltage-gated potassium channels                                        | 0.04913  | 1 | 1  |
| cobalamin biosynthetic process                                                        | 0.04913  | 1 | 1  |
| complement activation, classical pathway                                              | 0.04913  | 1 | 1  |
| dTDP biosynthetic process                                                             | 0.04913  | 1 | 1  |
| dTTP biosynthetic process                                                             | 0.04913  | 1 | 1  |
| long-term strengthening of neuromuscular junction                                     | 0.04913  | 1 | 1  |
| maturation of SSU-rRNA                                                                | 0.04913  | 1 | 1  |
| metal ion transport                                                                   | 0.04913  | 1 | 1  |
| middle ear morphogenesis                                                              | 0.04913  | 1 | 1  |
| nucleotide biosynthetic process                                                       | 0.04913  | 1 | 1  |
| outer ear morphogenesis                                                               | 0.04913  | 1 | 1  |
| phosphate transport                                                                   | 0.04913  | 1 | 1  |
| positive regulation of phagocytosis                                                   | 0.04913  | 1 | 1  |
| positive regulation of type IIa hypersensitivity                                      | 0.04913  | 1 | 1  |
| protein import into mitochondrial inner membrane                                      | 0.04913  | 1 | 1  |
| protein targeting to mitochondrion                                                    | 0.04913  | 1 | 1  |
| ribosomal small subunit assembly and maintenance                                      | 0.04913  | 1 | 1  |
| sequestering of neurotransmitter                                                      | 0.04913  | 1 | 1  |
| skeletal system morphogenesis                                                         | 0.04913  | 1 | 1  |
