# Supplementary material for: Both Noncoding and Protein-Coding RNAs Contribute to Gene Expression Evolution in the Primate Brain
Source: PubMed Central journal article supplement — Genome Biol Evol. 2010 Jan 18;2:67–79. doi: 10.1093/gbe/evq002 (PMC2839352; doi:10.1093/gbe/evq002), 2010-01-18
Supplement: evq002_6.pdf [file evq002_6.pdf]

## Intersection between Pollard et al. (2006) and differential expression

| Gene            | PANTHER Biological Process                                                          |
|-----------------|-------------------------------------------------------------------------------------|
| <b>AMY1A</b>    | Glycogen metabolism;Carbohydrate metabolism                                         |
| <b>BBX</b>      | Nucleoside                                                                          |
| <b>BRUNOL4</b>  | Nucleoside                                                                          |
| <b>CSORF36</b>  | Biological process unclassified                                                     |
| <b>C6ORF105</b> | Biological process unclassified                                                     |
| <b>CENPC1</b>   | Chromosome segregation;Cell cycle;Mitosis                                           |
| <b>DGKG</b>     | Lipid                                                                               |
| <b>DNAJB9</b>   | Protein folding;Protein metabolism and modification                                 |
| <b>EFNA5</b>    | Ligand-mediated signaling;Ectoderm development;Neurogenesis                         |
| <b>ELAC2</b>    | Nucleoside                                                                          |
| <b>EPHA5</b>    | Protein phosphorylation;Protein modification                                        |
| <b>ERBB4</b>    | Cell cycle control;Oogenesis;Protein phosphorylation                                |
| <b>FAM53A</b>   | Biological process unclassified                                                     |
| <b>FSTL4</b>    | Homeostasis                                                                         |
| <b>GPC6</b>     | Cell adhesion                                                                       |
| <b>LPHN2</b>    | Exocytosis;Regulated exocytosis;Neurotransmitter release                            |
| <b>MAD1L1</b>   | Cell cycle;Mitosis                                                                  |
| <b>METTL8</b>   | Biological process unclassified                                                     |
| <b>MKNK1</b>    | Protein phosphorylation;Developmental processes;Protein metabolism and modification |
| <b>NFIA</b>     | Nucleoside                                                                          |
| <b>NRP2</b>     | Angiogenesis;Mesoderm development                                                   |
| <b>REV3L</b>    | Nucleoside                                                                          |
| <b>RPA3</b>     | Biological process unclassified                                                     |
| <b>RUNX1T1</b>  | Nucleoside                                                                          |
| <b>SETBP1</b>   | Nucleoside                                                                          |
| <b>SNX19</b>    | Transport;Intracellular protein traffic                                             |
| <b>SUCLG2</b>   | Coenzyme and prosthetic group metabolism;Carbohydrate metabolism                    |
| <b>TMCC3</b>    | Biological process unclassified                                                     |
| <b>TOP1</b>     | General mRNA transcription activities;mRNA transcription                            |
| <b>TPK1</b>     | Miscellaneous                                                                       |
| <b>TSNARE1</b>  | Biological process unclassified                                                     |
| <b>UBE2E3</b>   | Protein modification;Protein metabolism and modification                            |
| <b>ZNF281</b>   | Nucleoside                                                                          |
| <b>ZNF608</b>   | Developmental processes;Ectoderm development;Neurogenesis                           |
| <b>ZNF770</b>   | Biological process unclassified                                                     |

## Intersection between Haygood et al. (2007) and differential expression

|                  |                                                                                  |
|------------------|----------------------------------------------------------------------------------|
| <b>ABHD5</b>     | Proteolysis;Protein metabolism and modification                                  |
| <b>ACADSB</b>    | Electron transport;Lipid                                                         |
| <b>ADAT2</b>     | Nucleoside                                                                       |
| <b>AFAP1L1</b>   | Biological process unclassified                                                  |
| <b>ALDH7A1</b>   | Other metabolism                                                                 |
| <b>ALG6</b>      | Protein glycosylation;Protein metabolism and modification                        |
| <b>APIP</b>      | Carbohydrate metabolism                                                          |
| <b>AQP11</b>     | Biological process unclassified                                                  |
| <b>ARHGAP27</b>  | Intracellular signaling cascade;Signal transduction                              |
| <b>ARHGAP4</b>   | Cell adhesion;Cell cycle;Cell proliferation and differentiation                  |
| <b>ASB2</b>      | Biological process unclassified                                                  |
| <b>AZI2</b>      | Cell communication;Signal transduction                                           |
| <b>BAI2</b>      | Cell adhesion;Cell surface receptor mediated signal transduction                 |
| <b>BRD7</b>      | Biological process unclassified                                                  |
| <b>BST1</b>      | Other metabolism                                                                 |
| <b>C11ORF47</b>  | Biological process unclassified                                                  |
| <b>C12ORF43</b>  | Biological process unclassified                                                  |
| <b>C14ORF126</b> | Biological process unclassified                                                  |
| <b>C18ORF22</b>  | Biological process unclassified                                                  |
| <b>C10RF102</b>  | Biological process unclassified                                                  |
| <b>C3ORF14</b>   | Biological process unclassified                                                  |
| <b>C9ORF85</b>   | Biological process unclassified                                                  |
| <b>CAT</b>       | Immunity and defense;Electron transport;Lipid                                    |
| <b>CCDC50</b>    | Biological process unclassified                                                  |
| <b>CCDC99</b>    | Biological process unclassified                                                  |
| <b>CD58</b>      | Biological process unclassified                                                  |
| <b>CLGN</b>      | Exocytosis;Intracellular protein traffic                                         |
| <b>CLU</b>       | Apoptosis                                                                        |
| <b>COPS8</b>     | Biological process unclassified                                                  |
| <b>CTPS</b>      | Nucleoside                                                                       |
| <b>DUOX1</b>     | Biological process unclassified                                                  |
| <b>EMILIN2</b>   | Cell adhesion                                                                    |
| <b>FAM62C</b>    | Biological process unclassified                                                  |
| <b>FBXO15</b>    | Biological process unclassified                                                  |
| <b>FGF9</b>      | Receptor protein tyrosine kinase signaling pathway;Signal transduction           |
| <b>FUNDC1</b>    | Biological process unclassified                                                  |
| <b>GCSH</b>      | Amino acid metabolism;Amino acid catabolism                                      |
| <b>HSDL1</b>     | Steroid metabolism;Lipid                                                         |
| <b>IFI35</b>     | Interferon-mediated immunity;Immunity and defense                                |
| <b>ISY1</b>      | Biological process unclassified                                                  |
| <b>ITGA5</b>     | Cell adhesion                                                                    |
| <b>KAT2A</b>     | Biological process unclassified                                                  |
| <b>LDHA</b>      | Glycolysis;Carbohydrate metabolism                                               |
| <b>LOC126147</b> | Biological process unclassified                                                  |
| <b>MAGOH</b>     | Oogenesis;Gametogenesis                                                          |
| <b>MAGOHB</b>    | Oogenesis;Gametogenesis                                                          |
| <b>MAT2A</b>     | Amino acid metabolism;Other amino acid metabolism                                |
| <b>ME2</b>       | Cell adhesion;Ectoderm development;Neurogenesis=                                 |
| <b>MFGE8</b>     | Angiogenesis;Signal transduction                                                 |
| <b>MRPS9</b>     | Protein biosynthesis;Protein metabolism and modification                         |
| <b>NDUFB8</b>    | Electron transport;Oxidative phosphorylation                                     |
| <b>NDUFV1</b>    | Electron transport;Oxidative phosphorylation                                     |
| <b>NPHS1</b>     | Cell adhesion                                                                    |
| <b>NRBP2</b>     | Protein phosphorylation;Protein modification;Protein metabolism and modification |
| <b>ORAOV1</b>    | Biological process unclassified                                                  |
| <b>OSTM1</b>     | Biological process unclassified                                                  |
| <b>PARK7</b>     | mRNA transcription;Stress response;Immunity and defense;Nucleoside               |
| <b>PCBD1</b>     | Nucleoside                                                                       |
| <b>PEX3</b>      | Biological process unclassified                                                  |
| <b>PFDN1</b>     | Cell cycle;Protein folding;Protein metabolism and modification                   |
| <b>PIK3IP1</b>   | Biological process unclassified                                                  |
| <b>RAB28</b>     | Intracellular protein traffic;Endocytosis                                        |
| <b>RAB3A</b>     | Intracellular protein traffic;Endocytosis                                        |
| <b>RBBP9</b>     | Biological process unclassified                                                  |
| <b>RBMS2</b>     | Nucleoside                                                                       |
| <b>RPL14</b>     | Protein biosynthesis;Protein metabolism and modification                         |
| <b>RPS16</b>     | Protein biosynthesis;Protein metabolism and modification                         |
| <b>RSL1D1</b>    | Protein biosynthesis;Protein metabolism and modification                         |
| <b>SCRG1</b>     | Biological process unclassified                                                  |
| <b>SEC23IP</b>   | Intracellular protein traffic;General vesicle transport                          |
| <b>SEC31B</b>    | Exocytosis;Intracellular protein traffic;General vesicle transport               |
| <b>SERBP1</b>    | Biological process unclassified                                                  |
| <b>SETD2</b>     | Nucleoside                                                                       |
| <b>SLC9A3R2</b>  | Biological process unclassified                                                  |
| <b>SNX19</b>     | Transport;Intracellular protein traffic;                                         |
| <b>SON</b>       | Biological process unclassified                                                  |
| <b>SP100</b>     | Nucleoside                                                                       |
| <b>SPATA7</b>    | Biological process unclassified                                                  |
| <b>SULT1A2</b>   | Steroid metabolism;Lipid                                                         |
| <b>SYT2</b>      | Exocytosis;Regulated exocytosis;Neurotransmitter release                         |
| <b>TAOK3</b>     | Phosphate metabolism;Protein phosphorylation                                     |
| <b>TERF1</b>     | Nucleoside                                                                       |
| <b>TMEM161A</b>  | Biological process unclassified                                                  |
| <b>TOMM40</b>    | Intracellular protein traffic;Mitochondrial transport                            |
| <b>TOP3B</b>     | Nucleoside                                                                       |
| <b>TRDMT1</b>    | Nucleoside                                                                       |
| <b>TRIM39</b>    | Proteolysis;Protein metabolism and modification                                  |
| <b>TXLNA</b>     | Intracellular protein traffic;General vesicle transport                          |
| <b>UROC1</b>     | Biological process unclassified                                                  |
| <b>USP19</b>     | Proteolysis;Protein metabolism and modification                                  |
| <b>WBP1</b>      | Biological process unclassified                                                  |
| <b>WDR19</b>     | Biological process unclassified                                                  |
| <b>ZBTB41</b>    | Biological process unclassified                                                  |
| <b>ZC3H8</b>     | Biological process unclassified                                                  |
| <b>ZDHHC9</b>    | Biological process unclassified                                                  |
| <b>ZNF37A</b>    | Spermatogenesis and motility;mRNA transcription                                  |
| <b>ZNF783</b>    | Biological process unclassified                                                  |

Table 2.
