# Supplementary material for: Both Noncoding and Protein-Coding RNAs Contribute to Gene Expression Evolution in the Primate Brain
Source: PubMed Central journal article supplement — Genome Biol Evol. 2010 Jan 18;2:67–79. doi: 10.1093/gbe/evq002 (PMC2839352; doi:10.1093/gbe/evq002), 2010-01-18
Supplement: evq002_7.pdf [file evq002_7.pdf]

## **Primate Tissue Samples used in the Tag-Seq assays**

| <b><i>Individual</i></b> | <b><i>Tissue</i></b> | <b><i>Identifier</i></b> | <b><i>Gender</i></b> | <b><i>Obtained From</i></b>                  |
|--------------------------|----------------------|--------------------------|----------------------|----------------------------------------------|
| Human 1                  | Cerebral Cortex      | a803146                  | M                    | BioChain Institute Incorporated              |
| Human 2                  | Cerebral Cortex      | a509243                  | M                    | BioChain Institute Incorporated              |
| Human 3                  | Cerebral Cortex      | a803149                  | M                    | BioChain Institute Incorporated              |
| Chimpanzee 1             | Cerebral Cortex      | 4X0327                   | M                    | Southwest National Primate Research Center   |
| Chimpanzee 2             | Cerebral Cortex      | 4X0391                   | M                    | Southwest National Primate Research Center   |
| Chimpanzee 3             | Cerebral Cortex      | 4X0505                   | M                    | Southwest National Primate Research Center   |
| Macaque 1                | Cerebral Cortex      | 19222                    | F                    | Southwest National Primate Research Center   |
| Macaque 2                | Cerebral Cortex      | A08296                   | M                    | New England Regional Primate Research Center |
| Macaque 3                | Cerebral Cortex      | A08298                   | M                    | New England Regional Primate Research Center |
