# Supplementary figures and images for: Both Noncoding and Protein-Coding RNAs Contribute to Gene Expression Evolution in the Primate Brain
Source: PubMed Central journal article supplement — Genome Biol Evol. 2010 Jan 18;2:67–79. doi: 10.1093/gbe/evq002 (PMC2839352; doi:10.1093/gbe/evq002), 2010-01-18

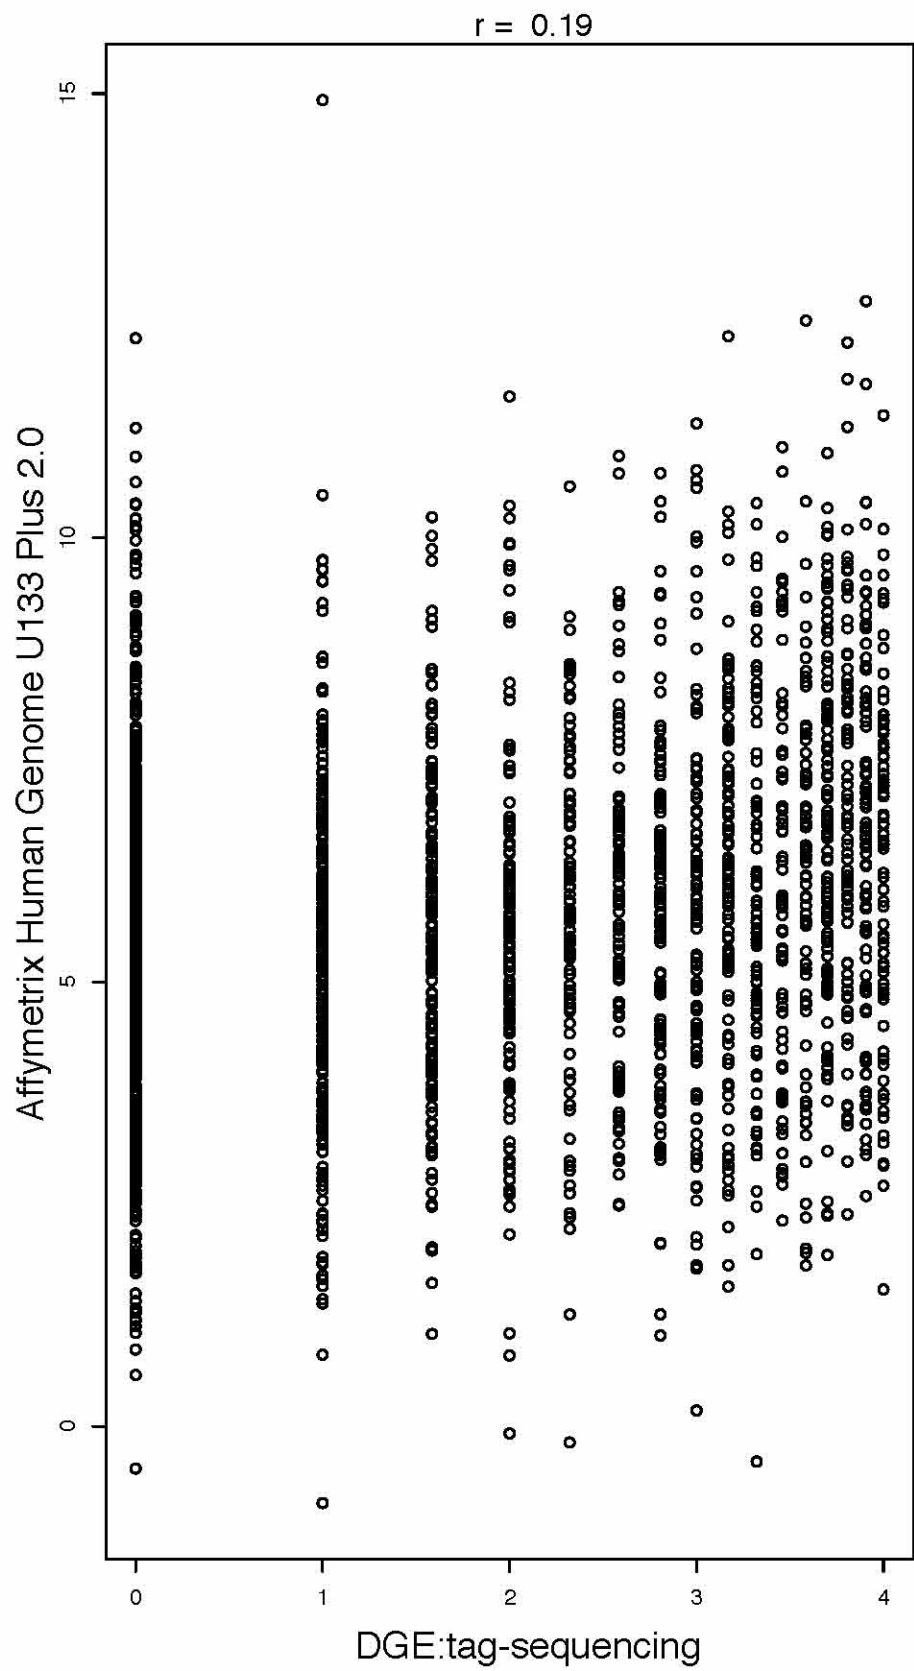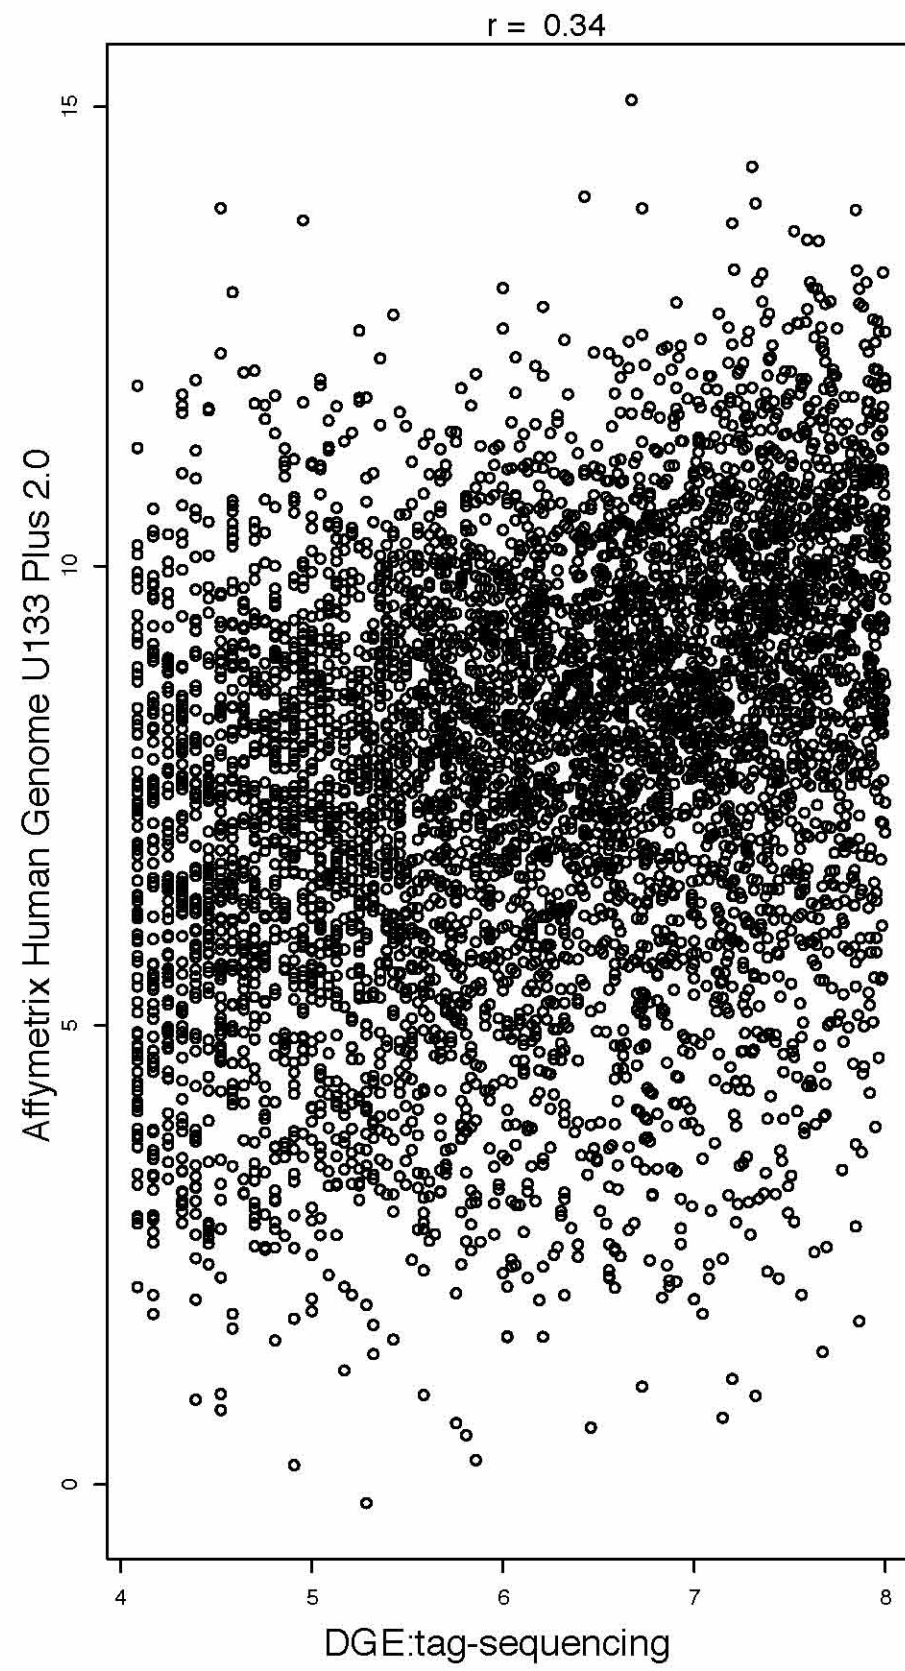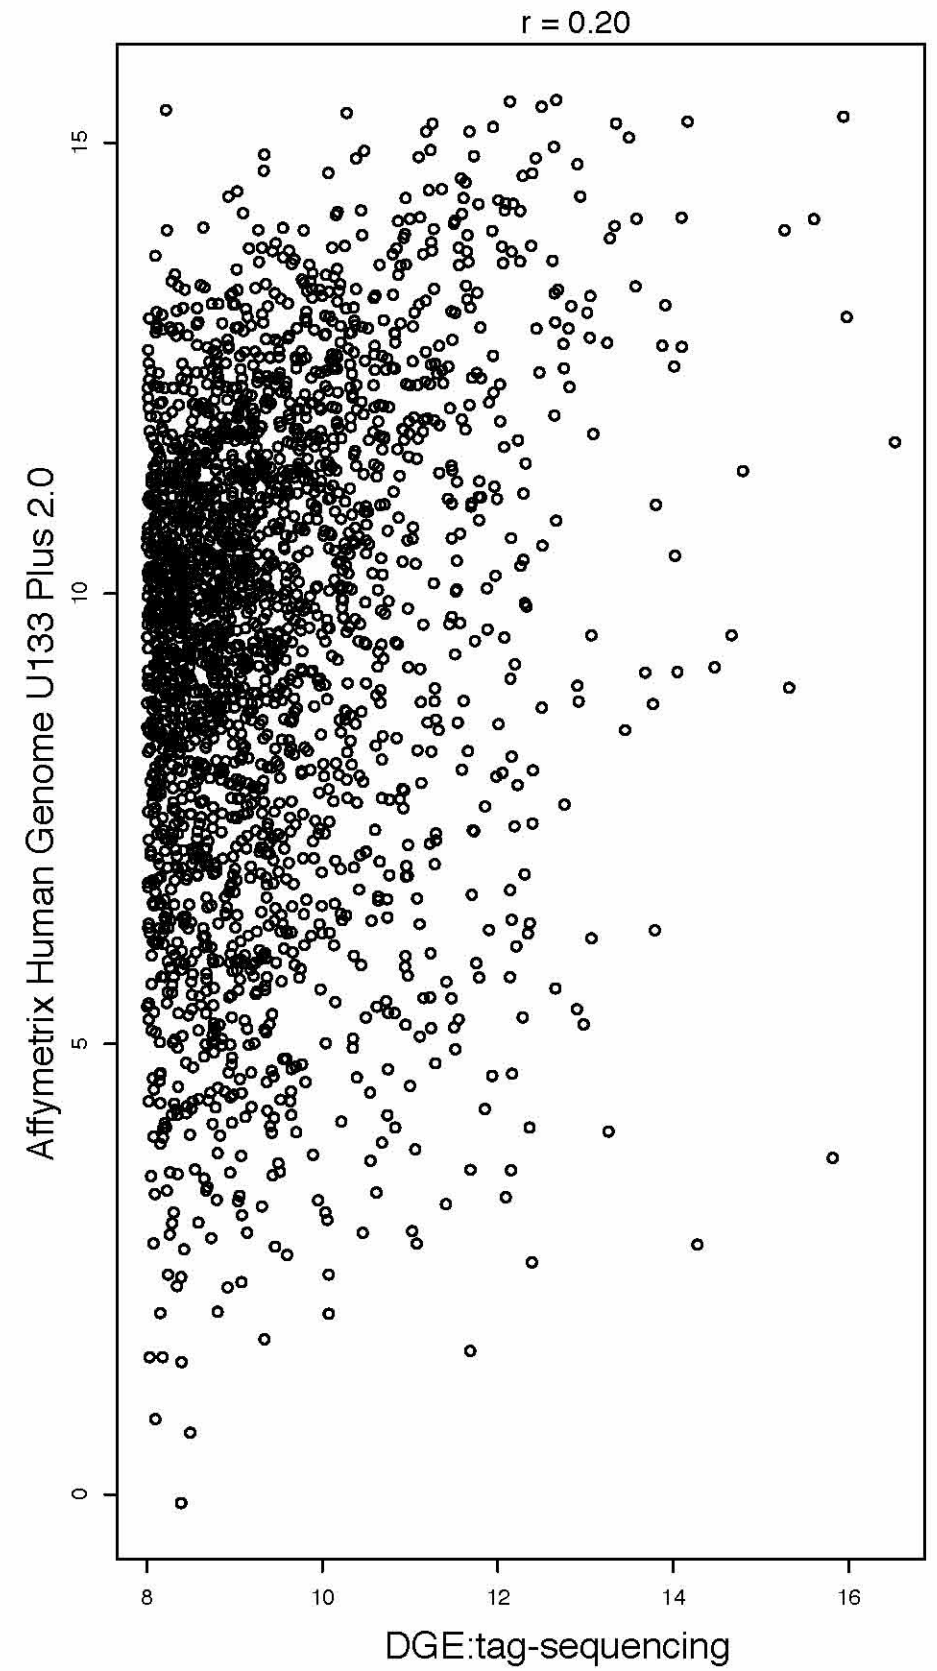

Supplement: evq002_1.pdf [file evq002_1.pdf]
